# Supplementary material for: Influence of study characteristics, methodological rigour and publication bias on efficacy of pharmacotherapy in obsessive-compulsive disorder: a systematic review and meta-analysis of randomised, placebo-controlled trials
Source: PubMed Central journal article supplement (PMC10862307; doi:10.1136/bmjment-2023-300951), 2024-02-12
Supplement: bmjment-2023-300951supp001.pdf [file bmjment-2023-300951supp001.pdf]

## Supplementary material

### *Search strategy*

Using a sensitivity-maximizing search, we included terms regarding the population and intervention, using an RCT filter. We did not use language or date restrictions. The search was conducted by author JD, clinical librarian and search specialist, in order to ensure a high degree of thoroughness. For population /domain being studied, we included the term obsessive-compulsive disorder and known synonyms. For intervention we used pharmacotherapy for OCD as recommended in the NICE treatment guideline and in the Anxiety and Depression Association of America treatment guideline. We searched for clomipramine, sertraline, paroxetine, fluoxetine and fluvoxamine, including known synonyms. Citalopram, escitalopram, mirtazapine and venlafaxine are not registered but are mentioned as treatment options in abovementioned guidelines, so we included them in our search.

We systematically searched Embase, Medline and PsycINFO. For the Embase search strategy, see figure S1. Comparable searches were done for Medline and PsycINFO. Additionally, we performed a scoping search of Cochrane CENTRAL which did not yield additional articles. We searched the WHI International Clinical Trial Registry Platform, as well as EUdRACT and clinicaltrials.gov. Additionally, we searched several symposia (ACNP, ECNP, Molecular Psychiatry, ADAA, IOCDF) for the last five years in order to included information that has not yet been published.

## Figure S1: Embase search strategy

Ovid Embase Classic+Embase &lt;1947 to 2023 February 21&gt;

Search date: 22 February 2023

RCT filter: [Box 3.e Cochrane Highly Sensitive Search Strategy for identifying controlled trials in Embase: (2018 revision); Ovid format (Glanville et al 2019b): <https://training.cochrane.org/handbook/version-6/chapter-4-tech-suppl>)]

| #  | Searches                                                                                                                                                                                                                                                                                                                                                                                                                                                                                                                                                                                                                                                                                                                                                                                                                                                                                                                                                                                                                                                                                                                                                                                                                                                                                                                                                                                                   | Results |
|----|------------------------------------------------------------------------------------------------------------------------------------------------------------------------------------------------------------------------------------------------------------------------------------------------------------------------------------------------------------------------------------------------------------------------------------------------------------------------------------------------------------------------------------------------------------------------------------------------------------------------------------------------------------------------------------------------------------------------------------------------------------------------------------------------------------------------------------------------------------------------------------------------------------------------------------------------------------------------------------------------------------------------------------------------------------------------------------------------------------------------------------------------------------------------------------------------------------------------------------------------------------------------------------------------------------------------------------------------------------------------------------------------------------|---------|
| 1  | obsessive compulsive disorder/                                                                                                                                                                                                                                                                                                                                                                                                                                                                                                                                                                                                                                                                                                                                                                                                                                                                                                                                                                                                                                                                                                                                                                                                                                                                                                                                                                             | 30691   |
| 2  | (obsessive compulsive disorder? or obsessive neurosis or compuls* neurosis or obsessive syndrome or ocd or Obsessive-Compulsive Scale or yale brown or ybocs or "y-bocs").ab,kw,ti.                                                                                                                                                                                                                                                                                                                                                                                                                                                                                                                                                                                                                                                                                                                                                                                                                                                                                                                                                                                                                                                                                                                                                                                                                        | 27736   |
| 3  | 1 or 2 [obsessive compulsive disorder]                                                                                                                                                                                                                                                                                                                                                                                                                                                                                                                                                                                                                                                                                                                                                                                                                                                                                                                                                                                                                                                                                                                                                                                                                                                                                                                                                                     | 40445   |
| 4  | (serotonin re?uptake inhibitor? or serotonin specific re?uptake inhibitor? or ssri? or 5?ht uptake inhibitor? or "5 Hydroxytryptamine uptake inhibitor?" or 5?ht re?uptake inhibitor? or "5 Hydroxytryptamine re?uptake inhibitor?").ab,kw,ti.                                                                                                                                                                                                                                                                                                                                                                                                                                                                                                                                                                                                                                                                                                                                                                                                                                                                                                                                                                                                                                                                                                                                                             | 29794   |
| 5  | (Sertralina or Sertraline or Sertralinum).ab,kw,ti,tn.                                                                                                                                                                                                                                                                                                                                                                                                                                                                                                                                                                                                                                                                                                                                                                                                                                                                                                                                                                                                                                                                                                                                                                                                                                                                                                                                                     | 8132    |
| 6  | (adjuvin or altruline or aremis or atruline or besitran or dominum or doxime or fatral or friped or gladem or lesefer or lustral or nudep or seltra or serad or sercerin or serlain or serlift or sertralin or sertraline hydrochloride or sertranex or sertranquil or sossor or tatig or tresleen or zolof or zoloft or zosert).ab,kw,ti,tn.                                                                                                                                                                                                                                                                                                                                                                                                                                                                                                                                                                                                                                                                                                                                                                                                                                                                                                                                                                                                                                                              | 3043    |
| 7  | (arketis or aropax or aroxat or brisdelle or daparox or deroxat or dexorat or divarius or dropax or dropaxin or euplix or eutilim or frosinor or mesafem or motivan or optipar or paluxetil or paluxon or paroc or parogen or paroxedura or paroxet or paroxetim or paroxetina or paroxetine hydrochloride or paroxetine mesilate or paroxetine mesylate or paroxia or paxan or paxil or paxtine or paxoxat or pexeva or serestill or sereupin or seroxat or setine or solben or syntopar or tagonis).ab,kw,ti,tn.                                                                                                                                                                                                                                                                                                                                                                                                                                                                                                                                                                                                                                                                                                                                                                                                                                                                                         | 3219    |
| 8  | (actan or adofen or afeksin or alzac or andep or andepin or ansilan or auroken or auscap or bioxetin or captaton or daforin or dagrilan or depren or deprex or deprexin or deprexin or deprizac or deproxin or diesan or diggassim or elizac or exostrept or felcium or fldiss or flotinal or floxet or fluctin or fluctine or fludac or flufan or fluketin or flunil or flunirin or fluohexal or fluoksetin or fluoksetyna or fluox or fluox-puren or fluoxac or fluoxeren or fluoxetin or fluoxetina or fluoxetine hydrochloride or fluoxiflar or fluoxil or fluoxone or fluoxone divule or fluoxtab or fluronin or flusac or flustad or flutin or flutine or flux or fluxemed or fluxen or fluxet or fluxetil or fluxetin or fluxil or fluxomed or fluzac or fokeston or fontex or foxetin or foxtin or fropine or fuloren or gerozac or ladose or lanclic or lorien or lovan or luramon or magrilan or margrilan or meropan or modipran or mutan or nopres or nuzak or olena or oaxetin or oxedep or plazeron or plinzene or pragmaten or prizma or proctin or prodep or prosac or prozac or prozamel or prozamin or prozep or prozit or psipax or qualisac or rapiflux or reconcile or reneuron or rowxetina or salipax or sanzur or sarafem or sartuzin or selfemra or serelsa or seromex or seronil or sinzacor sofeilin or "stephadilat-s" or xeredien or zactin or zepax or zinovat).ab,kw,ti,tn. | 129651  |
| 9  | (Fluvoxamina or Fluvoxamine or Fluvoxaminum or luvox).ab,kw,ti,tn.                                                                                                                                                                                                                                                                                                                                                                                                                                                                                                                                                                                                                                                                                                                                                                                                                                                                                                                                                                                                                                                                                                                                                                                                                                                                                                                                         | 4710    |
| 10 | (Citalopram or Citalopramum or Nitalapram or ctp).ab,kw,ti,tn.                                                                                                                                                                                                                                                                                                                                                                                                                                                                                                                                                                                                                                                                                                                                                                                                                                                                                                                                                                                                                                                                                                                                                                                                                                                                                                                                             | 18898   |
| 11 | (Citalopram or Escitalopram or Escitalopramum).ab,kw,ti,tn.                                                                                                                                                                                                                                                                                                                                                                                                                                                                                                                                                                                                                                                                                                                                                                                                                                                                                                                                                                                                                                                                                                                                                                                                                                                                                                                                                | 12264   |
| 12 | (Azamianserin or Mepirzapine or Mirtazapin or Mirtazapina or Mirtazapine or Mirtazapinum).ab,kw,ti,tn.                                                                                                                                                                                                                                                                                                                                                                                                                                                                                                                                                                                                                                                                                                                                                                                                                                                                                                                                                                                                                                                                                                                                                                                                                                                                                                     | 4052    |
| 13 | (Venlafaxina or Venlafaxine or Venlafaxinum).ab,kw,ti,tn.                                                                                                                                                                                                                                                                                                                                                                                                                                                                                                                                                                                                                                                                                                                                                                                                                                                                                                                                                                                                                                                                                                                                                                                                                                                                                                                                                  | 7243    |
| 14 | ("79617-96-2" or "61869-08-7" or "54910-89-3" or "54739-18-3" or "59729-33-8" or "128196-01-0" or "93413-69-5" or "303-49-1").ab,kw,rn.                                                                                                                                                                                                                                                                                                                                                                                                                                                                                                                                                                                                                                                                                                                                                                                                                                                                                                                                                                                                                                                                                                                                                                                                                                                                    | 107220  |
| 15 | or/4-14 [SSRI's]                                                                                                                                                                                                                                                                                                                                                                                                                                                                                                                                                                                                                                                                                                                                                                                                                                                                                                                                                                                                                                                                                                                                                                                                                                                                                                                                                                                           | 261967  |
| 16 | (Chloroimipramine or Chlorimipramine or Clomipramina or Clomipramine or Clomipraminum or Monochlorimipramine).ab,kw,ti,tn.                                                                                                                                                                                                                                                                                                                                                                                                                                                                                                                                                                                                                                                                                                                                                                                                                                                                                                                                                                                                                                                                                                                                                                                                                                                                                 | 4933    |
| 17 | 85650-52-8.ab,kw,rn.                                                                                                                                                                                                                                                                                                                                                                                                                                                                                                                                                                                                                                                                                                                                                                                                                                                                                                                                                                                                                                                                                                                                                                                                                                                                                                                                                                                       | 1301    |
| 18 | 16 or 17 [clomipramine]                                                                                                                                                                                                                                                                                                                                                                                                                                                                                                                                                                                                                                                                                                                                                                                                                                                                                                                                                                                                                                                                                                                                                                                                                                                                                                                                                                                    | 6219    |
| 19 | Randomized controlled trial/                                                                                                                                                                                                                                                                                                                                                                                                                                                                                                                                                                                                                                                                                                                                                                                                                                                                                                                                                                                                                                                                                                                                                                                                                                                                                                                                                                               | 774446  |
| 20 | Controlled clinical study/                                                                                                                                                                                                                                                                                                                                                                                                                                                                                                                                                                                                                                                                                                                                                                                                                                                                                                                                                                                                                                                                                                                                                                                                                                                                                                                                                                                 | 469013  |
| 21 | random\$.ti,ab.                                                                                                                                                                                                                                                                                                                                                                                                                                                                                                                                                                                                                                                                                                                                                                                                                                                                                                                                                                                                                                                                                                                                                                                                                                                                                                                                                                                            | 1945804 |
| 22 | randomization/                                                                                                                                                                                                                                                                                                                                                                                                                                                                                                                                                                                                                                                                                                                                                                                                                                                                                                                                                                                                                                                                                                                                                                                                                                                                                                                                                                                             | 98516   |
| 23 | intermethod comparison/                                                                                                                                                                                                                                                                                                                                                                                                                                                                                                                                                                                                                                                                                                                                                                                                                                                                                                                                                                                                                                                                                                                                                                                                                                                                                                                                                                                    | 294523  |
| 24 | placebo.ti,ab.                                                                                                                                                                                                                                                                                                                                                                                                                                                                                                                                                                                                                                                                                                                                                                                                                                                                                                                                                                                                                                                                                                                                                                                                                                                                                                                                                                                             | 366341  |
| 25 | (compare or compared or comparison).ti.                                                                                                                                                                                                                                                                                                                                                                                                                                                                                                                                                                                                                                                                                                                                                                                                                                                                                                                                                                                                                                                                                                                                                                                                                                                                                                                                                                    | 627631  |
| 26 | ((evaluated or evaluate or evaluating or assessed or assess) and (compare or compared or comparing or comparison)).ab.                                                                                                                                                                                                                                                                                                                                                                                                                                                                                                                                                                                                                                                                                                                                                                                                                                                                                                                                                                                                                                                                                                                                                                                                                                                                                     | 2722771 |
| 27 | (open adj label).ti,ab.                                                                                                                                                                                                                                                                                                                                                                                                                                                                                                                                                                                                                                                                                                                                                                                                                                                                                                                                                                                                                                                                                                                                                                                                                                                                                                                                                                                    | 106794  |
| 28 | ((double or single or doubly or singly) adj (blind or blinded or blindly)).ti,ab.                                                                                                                                                                                                                                                                                                                                                                                                                                                                                                                                                                                                                                                                                                                                                                                                                                                                                                                                                                                                                                                                                                                                                                                                                                                                                                                          | 276766  |
| 29 | double blind procedure/                                                                                                                                                                                                                                                                                                                                                                                                                                                                                                                                                                                                                                                                                                                                                                                                                                                                                                                                                                                                                                                                                                                                                                                                                                                                                                                                                                                    | 210213  |
| 30 | parallel group\$.ti,ab.                                                                                                                                                                                                                                                                                                                                                                                                                                                                                                                                                                                                                                                                                                                                                                                                                                                                                                                                                                                                                                                                                                                                                                                                                                                                                                                                                                                    | 31735   |
| 31 | (crossover or cross over).ti,ab.                                                                                                                                                                                                                                                                                                                                                                                                                                                                                                                                                                                                                                                                                                                                                                                                                                                                                                                                                                                                                                                                                                                                                                                                                                                                                                                                                                           | 124308  |
| 32 | ((assign\$ or match or matched or allocation) adj5 (alternate or group\$1 or intervention\$1 or patient\$1 or subject\$1 or participant\$1)).ti,ab.                                                                                                                                                                                                                                                                                                                                                                                                                                                                                                                                                                                                                                                                                                                                                                                                                                                                                                                                                                                                                                                                                                                                                                                                                                                        | 410629  |
| 33 | (assigned or allocated).ti,ab.                                                                                                                                                                                                                                                                                                                                                                                                                                                                                                                                                                                                                                                                                                                                                                                                                                                                                                                                                                                                                                                                                                                                                                                                                                                                                                                                                                             | 483810  |
| 34 | (controlled adj7 (study or design or trial)).ti,ab.                                                                                                                                                                                                                                                                                                                                                                                                                                                                                                                                                                                                                                                                                                                                                                                                                                                                                                                                                                                                                                                                                                                                                                                                                                                                                                                                                        | 446692  |
| 35 | (volunteer or volunteers).ti,ab.                                                                                                                                                                                                                                                                                                                                                                                                                                                                                                                                                                                                                                                                                                                                                                                                                                                                                                                                                                                                                                                                                                                                                                                                                                                                                                                                                                           | 285865  |
| 36 | human experiment/                                                                                                                                                                                                                                                                                                                                                                                                                                                                                                                                                                                                                                                                                                                                                                                                                                                                                                                                                                                                                                                                                                                                                                                                                                                                                                                                                                                          | 639759  |
| 37 | trial.ti.                                                                                                                                                                                                                                                                                                                                                                                                                                                                                                                                                                                                                                                                                                                                                                                                                                                                                                                                                                                                                                                                                                                                                                                                                                                                                                                                                                                                  | 403012  |
| 38 | or/19-37 [RCT filter]                                                                                                                                                                                                                                                                                                                                                                                                                                                                                                                                                                                                                                                                                                                                                                                                                                                                                                                                                                                                                                                                                                                                                                                                                                                                                                                                                                                      | 6286852 |
| 39 | (error or erratum or letter or editorial).ab,kw,pt,ti.                                                                                                                                                                                                                                                                                                                                                                                                                                                                                                                                                                                                                                                                                                                                                                                                                                                                                                                                                                                                                                                                                                                                                                                                                                                                                                                                                     | 2745590 |
| 40 | 3 and (15 or 18) and 38                                                                                                                                                                                                                                                                                                                                                                                                                                                                                                                                                                                                                                                                                                                                                                                                                                                                                                                                                                                                                                                                                                                                                                                                                                                                                                                                                                                    | 2008    |
| 41 | 3 and (15 or 18) and 39                                                                                                                                                                                                                                                                                                                                                                                                                                                                                                                                                                                                                                                                                                                                                                                                                                                                                                                                                                                                                                                                                                                                                                                                                                                                                                                                                                                    | 726     |
| 42 | JPRN-UMIN00001726.cn.                                                                                                                                                                                                                                                                                                                                                                                                                                                                                                                                                                                                                                                                                                                                                                                                                                                                                                                                                                                                                                                                                                                                                                                                                                                                                                                                                                                      | 0       |
| 43 | or/40-42                                                                                                                                                                                                                                                                                                                                                                                                                                                                                                                                                                                                                                                                                                                                                                                                                                                                                                                                                                                                                                                                                                                                                                                                                                                                                                                                                                                                   | 2682    |

*In- and exclusion of studies.*

With full-text screening, we excluded 23 studies for using the same data from a trial that had already been presented in an earlier paper. We excluded eight studies for not using the YBOCS scale as outcome measure and seven for not using a placebo control group. 17 were excluded because they were a review or comment and three for presenting a case report. Three papers did not provide enough efficacy data to include them in our review, even after requests for information. We excluded one study for using 24 hours as endpoint, after administering intravenous clomipramine.

#### *Risk of bias assessment.*

We used the <https://methods.cochrane.org/risk-bias-2>, and through the official guidance document we filled in the risk of bias template for each study. See **table S1**, in which we simplified and summarized our risk of bias assessment.

**Table S1: Risk of bias assessment**

| Study                | Domain 1<br>Randomization                                                                              | Domain 2a<br>Assignment | Domain 3<br>Missing outcome data                       | Domain 4<br>Outcome measurement | Domain 5<br>Reporting                                | Overall risk of bias |
|----------------------|--------------------------------------------------------------------------------------------------------|-------------------------|--------------------------------------------------------|---------------------------------|------------------------------------------------------|----------------------|
| Chouinard, 1990, (1) | Some concerns<br>1.1./1.2 : Unclear allocation sequence / concealment                                  | Low                     | Low                                                    | Low                             | Some concerns<br>5.1 No pre-specified analysis plan. | Some concerns        |
| CSG 1, 1991, (2)     | Some concerns<br>1.1./1.2 : Unclear allocation sequence / concealment                                  | Low                     | Low                                                    | Low                             | Some concerns<br>5.1 No pre-specified analysis plan. | Some concerns        |
| CSG 2, 1992, (2)     | Some concerns<br>1.1./1.2 : Unclear allocation sequence / concealment                                  | Low                     | 3.1 not all ptcpts that were randomized, were analyzed | Low                             | Some concerns<br>5.1 No pre-specified analysis plan. | High                 |
| Foa, 2005 (3)        | Low                                                                                                    | High                    | High                                                   | Low                             | Some concerns<br>5.1 no pre-specified analysis plan  | High                 |
| Goodman, 1989, (4)   | Some concerns<br>1.1./1.2 : Unclear allocation sequence / concealment                                  | Low                     | High<br>3.1 No ITT analysis, >10 % dropout             | Low                             | Some concerns<br>5.1 No pre-specified analysis plan. | High                 |
| Goodman, 1996 (5)    | High. 1.1/1.2 unclear, and<br>1.3 Allocation, age and gender all identical. Exceeds chance expectation | Low                     | Low                                                    | Low                             | Some concerns<br>5.1 No pre-specified analysis plan. | High                 |

|                       |                                                                       |                                                        |                                                |     |                                                      |               |
|-----------------------|-----------------------------------------------------------------------|--------------------------------------------------------|------------------------------------------------|-----|------------------------------------------------------|---------------|
| Greist, 1995 (6)      | Low                                                                   | Low                                                    | Low                                            | Low | Some concerns<br>5.1 No pre-specified analysis plan. | Some concerns |
| Hollander, 2003f (7)  | Low                                                                   | Low                                                    | Low                                            | Low | Some concerns<br>5.1 No pre-specified analysis plan. | Some concerns |
| Hollander, 2003p (8)  | Low                                                                   | Low                                                    | Low                                            | Low | Some concerns<br>5.1 No pre-specified analysis plan. | Some concerns |
| Jenike, 1989 (9)      | Some concerns<br>1.1./1.2 : Unclear allocation sequence / concealment | High<br>2.6/2.7 ITT unclear possible impact on results | Some concerns<br>3.1 ITT unclear, >10% dropout | Low | Some concerns<br>5.1 No pre-specified analysis plan. | High          |
| Jenike, 1990f (10)    | Low                                                                   | Some concerns<br>2.6 no ITT, 2 dropouts, minor         | Low                                            | Low | Some concerns<br>5.1 No pre-specified analysis plan. | Some concerns |
| Jenike, 1997 (11)     | Low                                                                   | Low                                                    | Low                                            | Low | Low                                                  | Low           |
| Kamajima, 2004 (12)   | Some concerns<br>1.1./1.2 : Unclear allocation sequence / concealment | Low                                                    | Low                                            | Low | Some concerns<br>5.1 No pre-specified analysis plan. | Some concerns |
| Kronig, 1999 (13)     | Low                                                                   | Low                                                    | Low                                            | Low | Some concerns<br>5.1 No pre-specified analysis plan. | Some concerns |
| Mallya, 1992 (14)     | Some concerns<br>1.1./1.2 : Unclear allocation sequence / concealment | High<br>2.6/2.7 No ITT analysis, >10 % attrition       | High<br>3.1 No ITT analysis, >10 % dropout     | Low | Some concerns<br>5.1 No pre-specified analysis plan. | High          |
| Montgomery, 2001 (15) | Low                                                                   | Low                                                    | Low                                            | Low | Low                                                  | Low           |
| Montgomery, 1993 (16) | Low                                                                   | Low                                                    | Low                                            | Low | Low                                                  | Low           |
| Nakatana, 2005 (17)   | High<br>1.1 allocation not random                                     | High<br>2.6/2.7 No ITT analysis, >10 % attrition       | Some concerns<br>3.1 >10 % dropout             | Low | Some concerns<br>5.1 No pre-specified analysis plan. | High          |
| Stein, 2007 (18)      | Low                                                                   | Low                                                    | Low                                            | Low | Low                                                  | Low           |
| Tollefson, 1994 (19)  | Low                                                                   | Low                                                    | Low                                            | Low | Some concerns<br>5.1 No pre-specified analysis plan. | Some concerns |
| Zohar, 1996 (20)      | Some concerns                                                         | Low                                                    | Low                                            | Low | Some concerns                                        | Some concerns |

|  |                                                      |  |  |  |                                     |  |
|--|------------------------------------------------------|--|--|--|-------------------------------------|--|
|  | 1.1./1.2 : Unclear allocation sequence / concealment |  |  |  | 5.1 No pre-specified analysis plan. |  |
|--|------------------------------------------------------|--|--|--|-------------------------------------|--|

### Meta-regression analysis

For studies included in our multiple metaregression, we used a multicollinearity test in order to avoid overfitting, whereby studies with a high correlation ( $r > 0.8$ ) would be excluded from the multiple meta-regression. As **table S2** shows, no studies were correlated to the degree of redundancy.

**Table S2: multicollinearity testing**

|                   | Publication Year | Trial arms | Sponsor status | High Risk of Bias | Clomipramine use |
|-------------------|------------------|------------|----------------|-------------------|------------------|
| Publication Year  |                  | -0.37      | 0.22           | -0.22             | -0.24            |
| Trial arms        | -0.37            |            | -0.37          | -0.53             | -0.20            |
| Sponsor status    | 0.22             | -0.37      |                | -0.63             | -0.24            |
| High Risk of Bias | -0.22            | 0.53       | -0.63          |                   | 0.40             |
| Clomipramine Use  | -0.24            | -0.20      | -0.19          | 0.40              |                  |

Using anova, we compared performance and correctness of fit of the different multiple meta-regression models. The multiple metaregression using clomipramine and high risk of bias performed significantly better than individual regression models (see **table S3**). Further increasing model complexity did not lead to a significantly better performance. Corrected Akaike's information criterion was lowest for the model using clomipramine and high risk of bias (see **table S4**). Using the parsimony principle, the metaregression with high risk of bias and clomipramine was preferred over more complex models. Notable, furthermore, is that even when using the most complex model including all metaregression variables, clomipramine remained a significant predictor (beta -0.39, 95%CI -0.70 to -0.076,  $p = 0.017$ ).

**Table S3: Model performance of metaregressions**

| Comparison of model performance                                                           | LRT | p-value |
|-------------------------------------------------------------------------------------------|-----|---------|
| Clomipramine + High RoB vs. High RoB                                                      | 6.9 | 0.009   |
| Clomipramine + High RoB vs. Clomipramine                                                  | 4.9 | 0.0276  |
| Clomi + High RoB + sponsor status vs Clomipramine + High RoB                              | 1.5 | 0.22    |
| Clomipramine vs. High RoB vs Clomipramine + High RoB + publication year                   | 2.8 | 0.10    |
| Clomi + High RoB + sponsor status vs Clomi + High RoB + sponsor status + publication year | 2.7 | 0.10    |
| Clomi + High RoB + sponsor status vs. full model                                          | 4.2 | 0.12    |

LRT: likelihood ratio test statistic

**Table S4: Akaike's information criterion of metaregressions**

| Variables in regression model               | AICc |
|---------------------------------------------|------|
| High risk of bias                           | 26.1 |
| Clomipramine use                            | 24.1 |
| High risk + clomipramine                    | 21.8 |
| High risk + clomipramine + publication year | 21.8 |
| High risk + clomipramine + sponsor status   | 23.2 |
| Full model                                  | 23.6 |

AICc = Corrected Akaike's information criterion

### *Meta-regression of SSRI studies*

As described in our main analysis, heterogeneity was low across SSRI studies ( $I^2 = 16.0\%$ ,  $\tau^2 < 0.0001$ ), and the test for heterogeneity was not significant ( $Q = 30$ ,  $p = 0.23$ ), suggesting the effect of SSRIs

compared to placebo to be consistent across studies. Meta-regressions for different SSRI's were not significant. Results persisted when considering a prediction interval (95% PI -0.55 to -0.39).

Figure S2 Forest plot for SSRI studies only

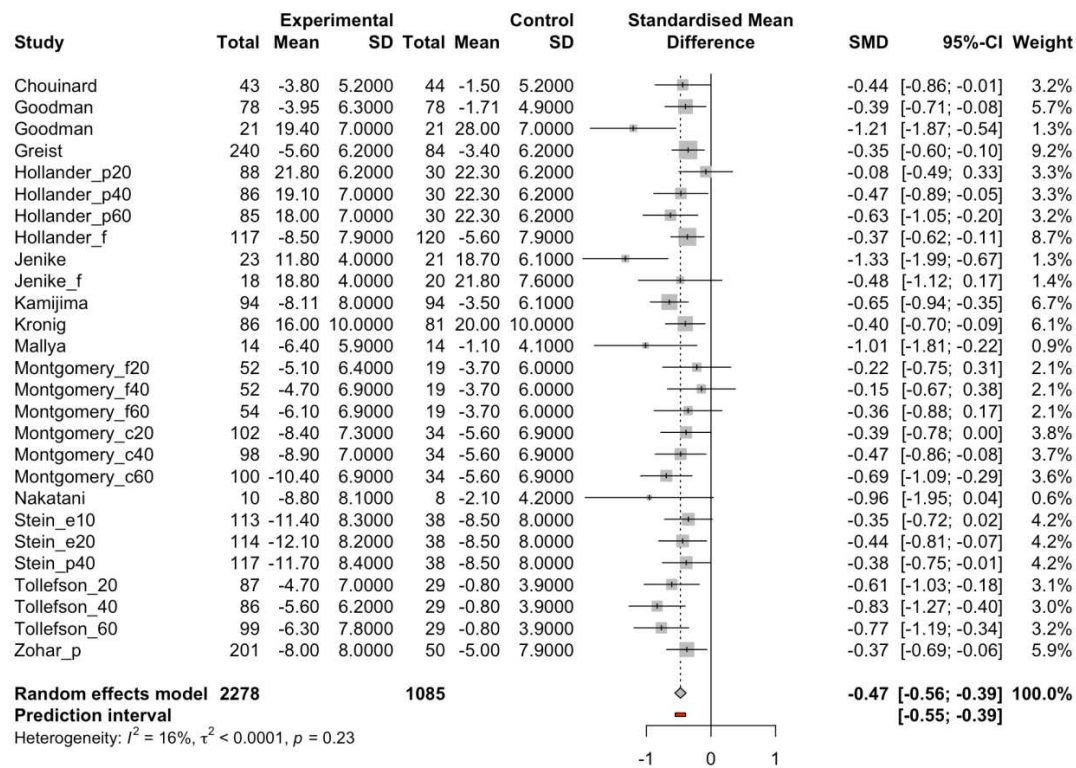

### Publication bias

We used the `robustbayesiancopas` package in order to perform our Bayesian analysis of selection bias and used their proposed methods. We used multiple assumptions about distribution of the random effect (Student's T, Laplace, normal and slash distributions). Then, we extracted the Deviance Information Criterion (DIC) for each model to compare their goodness of fit. As slash distributions had the best fit (i.e. the lowest DIC), we used this distribution in further calculations. We then estimated the correlations parameter and fit a Bayesian model with and without correction for bias. We repeated our analysis multiple times using different seed settings which did not change the results. For SSRI studies only, using a Bayesian Copas selection model, we found a moderate effect of publication bias ( $D = 0.48$ ) similarly to the full sample, with a decrease of 0.077 SMD, from  $-0.48$  (95% credible interval  $-0.57$  to  $-0.40$ ) to  $-0.41$  (95% credible interval  $-0.54$  to  $-0.22$ ).



### Sensitivity analysis

After fully excluding all studies with a high risk of bias, clomipramine was still associated with a higher effect size ( $-0.38$ ,  $p = 0.028$ , 95% CI  $= -0.72$  to  $-0.044$ ), emphasizing the robustness of our finding that clomipramine has a higher efficacy than SSRI's when compared to placebo.

After combining intervention arms using different fixed doses, efficacy measures were comparable (SMD =  $-0.65$ , 95% CI  $-0.83$  to  $-0.46$ ). See **figure S3** for forest plot, including measures of heterogeneity. Furthermore, outcomes of meta-regression remained largely unchanged, except non-significance of the amount of intervention arms that were used. As our original analysis method increases the relative weight of studies with multiple intervention arms, the fact that in this analysis intervention arms are not significantly related to efficacy is an important addition to our original findings. Please see **table S5** for single meta-regression results, and **table S6** for multiple metaregression including high risk of bias and clomipramine use. Furthermore, precision of estimates broadly decreased, with higher p-values, which is understandable considering the combination of doses decreases the degree of freedom for meta-regressions.

**Figure S3** forest plot of studies with fixed doses combined in a single intervention arm.

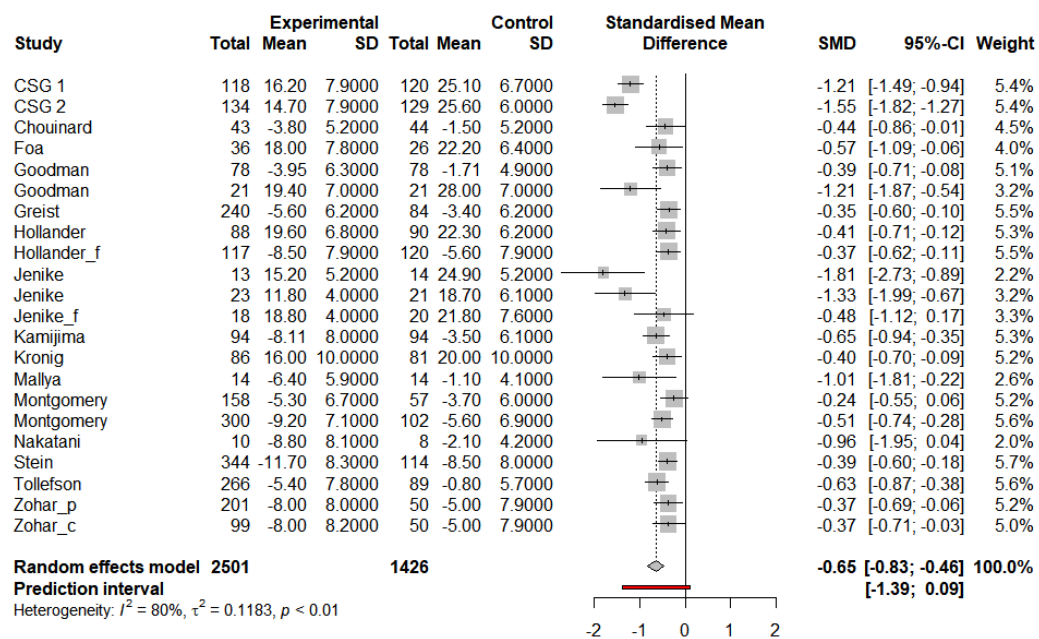

**Table S5** single regression outcomes for combined fixed doses.

| Predictor                     | Beta-coefficient | P-value | 95% CI Lower | 95% CI Upper |
|-------------------------------|------------------|---------|--------------|--------------|
| <i>Categorical predictors</i> |                  |         |              |              |
| High risk of bias             | - 0.49           | 0.012   | - 0.87       | -0.12        |
| Clomipramine use              | -0.53            | 0.0073  | -0.90        | -0.16        |
| Fully sponsored               | 0.44             | 0.041   | 0.020        | 0.87         |
| Two-armed intervention trial  | -0.33            | 0.060   | -0.67        | 0.015        |
| Use of placebo run-in         | 0.052            | 0.84    | -0.47        | 0.58         |
| Flexible dose                 | -0.25            | 0.17    | -0.62        | 0.11         |
| <i>Continuous predictors</i>  |                  |         |              |              |
| Publication year              | 0.031            | 0.048   | 0.0030       | 0.062        |
| Mean age                      | 0.074            | 0.091   | -0.013       | 0.16         |
| Mean severity                 | -0.0038          | 0.94    | -0.11        | 0.10         |
| Duration of illness           | -0.019           | 0.44    | -0.072       | 0.034        |
| Percentage male               | 0.0075           | 0.50    | -0.015       | 0.030        |

**Table S6**  
multiple

regression outcomes for combined fixed doses

| Predictor         | Beta-coefficient | p-Value | 95% CI lower | 95% CI upper |
|-------------------|------------------|---------|--------------|--------------|
| High Risk of Bias | -0.34            | 0.069   | -0.70        | 0.029        |
| Clomipramine Use  | -0.43            | 0.022   | -0.79        | -0.070       |

**Table S7**

| No of patients (studies) | Design | Limitations         | Inconsistency          | Indirectness    | Imprecision        | Publication Bias              |
|--------------------------|--------|---------------------|------------------------|-----------------|--------------------|-------------------------------|
| 4102 (21)_               | RCT's  | Serious limitations | Moderate inconsistency | Direct outcomes | Adequate precision | Suspicion of publication bias |

GRADE assessment for quality of evidence, for outcome of YBOCS change at primary endpoint. All studies

were placebo-controlled RCT's. There were serious limitations due to most studies being at moderate risk of bias. Results were inconsistent, but less so for SSRI's. Outcomes were direct, meaning population, intervention, or outcomes are comparable.

1. Chouinard G, Goodman W, Greist J, Jenike M, Rasmussen S, White K, et al. Results of a double-blind placebo controlled trial of a new serotonin uptake inhibitor, sertraline, in the treatment of obsessive-compulsive disorder. *Psychopharmacol Bull.* 1990;26(3):279-84.
2. Clomipramine in the treatment of patients with obsessive-compulsive disorder. The Clomipramine Collaborative Study Group. *Arch Gen Psychiatry.* 1991;48(8):730-8.
3. Foa EB, Liebowitz MR, Kozak MJ, Davies S, Campeas R, Franklin ME, et al. Randomized, placebo-controlled trial of exposure and ritual prevention, clomipramine, and their combination in the treatment of obsessive-compulsive disorder. *Am J Psychiatry.* 2005;162(1):151-61.
4. Goodman WK, Price LH, Rasmussen SA, Delgado PL, Heninger GR, Charney DS. Efficacy of fluvoxamine in obsessive-compulsive disorder. A double-blind comparison with placebo. *Arch Gen Psychiatry.* 1989;46(1):36-44.
5. Goodman WK, Kozak MJ, Liebowitz M, White KL. Treatment of obsessive-compulsive disorder with fluvoxamine: a multicentre, double-blind, placebo-controlled trial. *Int Clin Psychopharmacol.* 1996;11(1):21-9.
6. Greist J, Chouinard G, DuBoff E, Halaris A, Kim SW, Koran L, et al. Double-blind parallel comparison of three dosages of sertraline and placebo in outpatients with obsessive-compulsive disorder. *Arch Gen Psychiatry.* 1995;52(4):289-95.
7. Hollander E, Koran LM, Goodman WK, Greist JH, Ninan PT, Yang H, et al. A double-blind, placebo-controlled study of the efficacy and safety of controlled-release fluvoxamine in patients with obsessive-compulsive disorder. *J Clin Psychiatry.* 2003;64(6):640-7.
8. Hollander E, Allen A, Steiner M, Wheadon DE, Oakes R, Burnham DB. Acute and long-term treatment and prevention of relapse of obsessive-compulsive disorder with paroxetine. *J Clin Psychiatry.* 2003;64(9):1113-21.
9. Jenike MA, Baer L, Summergrad P, Weilburg JB, Holland A, Seymour R. Obsessive-compulsive disorder: a double-blind, placebo-controlled trial of clomipramine in 27 patients. *Am J Psychiatry.* 1989;146(10):1328-30.
10. Jenike MA, Hyman S, Baer L, Holland A, Minichiello WE, Buttolph L, et al. A controlled trial of fluvoxamine in obsessive-compulsive disorder: implications for a serotonergic theory. *Am J Psychiatry.* 1990;147(9):1209-15.
11. Jenike MA, Baer L, Minichiello WE, Rauch SL, Buttolph ML. Placebo-controlled trial of fluoxetine and phenelzine for obsessive-compulsive disorder. *Am J Psychiatry.* 1997;154(9):1261-4.
12. Kamijima K, Murasaki M, Asai M, Higuchi T, Nakajima T, Taga C, Matsunaga H. Paroxetine in the treatment of obsessive-compulsive disorder: randomized, double-blind, placebo-controlled study in Japanese patients. *Psychiatry Clin Neurosci.* 2004;58(4):427-33.
13. Kronig MH, Apter J, Asnis G, Bystritsky A, Curtis G, Ferguson J, et al. Placebo-controlled, multicenter study of sertraline treatment for obsessive-compulsive disorder. *J Clin Psychopharmacol.* 1999;19(2):172-6.
14. Mallya GK, White K, Waternaux C, Quay S. Short- and Long-Term Treatment of Obsessive-Compulsive Disorder with Fluvoxamine. *Annals of Clinical Psychiatry.* 1992;4(2):77-80.

15. Montgomery SA, Kasper S, Stein DJ, Bang Hedegaard K, Lemming OM. Citalopram 20 mg, 40 mg and 60 mg are all effective and well tolerated compared with placebo in obsessive-compulsive disorder. *Int Clin Psychopharmacol.* 2001;16(2):75-86.
16. Montgomery SA, McIntyre A, Osterheider M, Sarteschi P, Zitterl W, Zohar J, et al. A double-blind, placebo-controlled study of fluoxetine in patients with DSM-III-R obsessive-compulsive disorder. The Lilly European OCD Study Group. *Eur Neuropsychopharmacol.* 1993;3(2):143-52.
17. Nakatani E, Nakagawa A, Nakao T, Yoshizato C, Nabeyama M, Kudo A, et al. A randomized controlled trial of Japanese patients with obsessive-compulsive disorder--effectiveness of behavior therapy and fluvoxamine. *Psychother Psychosom.* 2005;74(5):269-76.
18. Stein DJ, Andersen EW, Tonnoir B, Fineberg N. Escitalopram in obsessive-compulsive disorder: a randomized, placebo-controlled, paroxetine-referenced, fixed-dose, 24-week study. *Curr Med Res Opin.* 2007;23(4):701-11.
19. Tollefson GD, Rampey AH, Jr., Potvin JH, Jenike MA, Rush AJ, Kominguez RA, et al. A multicenter investigation of fixed-dose fluoxetine in the treatment of obsessive-compulsive disorder. *Arch Gen Psychiatry.* 1994;51(7):559-67.
20. Zohar J, Judge R. Paroxetine versus clomipramine in the treatment of obsessive-compulsive disorder. OCD Paroxetine Study Investigators. *Br J Psychiatry.* 1996;169(4):468-74.
